# Supplementary material for: Risk Scores in ST-Segment Elevation Myocardial Infarction Patients with Refractory Cardiogenic Shock and Veno-Arterial Extracorporeal Membrane Oxygenation
Source: PubMed Central journal article supplement (PMC7957612; doi:10.3390/jcm10050956), 2021-03-01

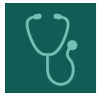

Original research article

# Risk Scores in ST-Segment Elevation Myocardial Infarction Patients with Refractory Cardiogenic Shock and Veno-Arterial Extracorporeal Membrane Oxygenation

Carl Semaan et al.

## SUPPLEMENTARY MATERIAL

**Table S1: ENCOURAGE Score Calculation, Independent pre-VA-ECMO variables associated with mortality**

| Variables                              | ENCOURAGE Score: Number of Points |
|----------------------------------------|-----------------------------------|
| Age > 60 years                         | 5                                 |
| Female Gender                          | 7                                 |
| Body Mass Index > 25 kg/m <sup>2</sup> | 6                                 |
| Glasgow Coma Scale Score < 6           | 6                                 |
| Serum Creatinine > 150 µmol/l          | 5                                 |
| Arterial Lactate                       |                                   |
| < 2 mmol/l                             | 0                                 |
| 2-8 mmol/l                             | 8                                 |
| > 8 mmol/l                             | 11                                |
| Prothrombin ratio < 50 %               | 5                                 |

According to Muller *et al.* 2016

**Table S2: Expected Survival at 30 Days and Observed Survival at 30 days According to the 5 Classes of the ENCOURAGE Score.**

| ENCOURAGE Score Classes | ENCOURAGE Score Expected Survival | Observed Survival in our Cohort (n=51) |
|-------------------------|-----------------------------------|----------------------------------------|
| 0 – 12 points           | 92 %                              | 88 %                                   |
| 13 – 18 points          | 70 %                              | 83 %                                   |
| 19 – 22 points          | 35 %                              | 67 %                                   |
| 23 – 27 points          | 28 %                              | 44 %                                   |
| ≥ 28 points             | 17 %                              | 20 %                                   |

According to Muller *et al.* 2016

**Figure S1: Flow Chart**

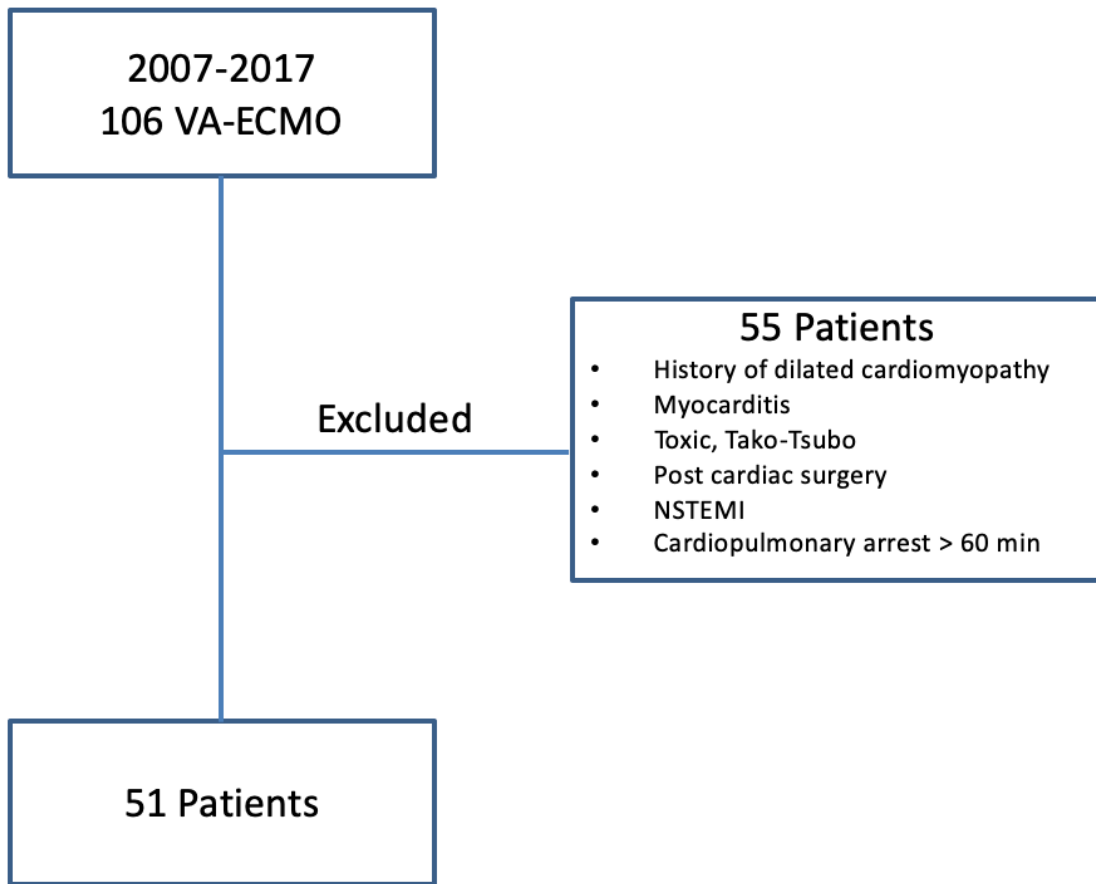

Figure S2: Diagram representing 30-day and 6-month survival

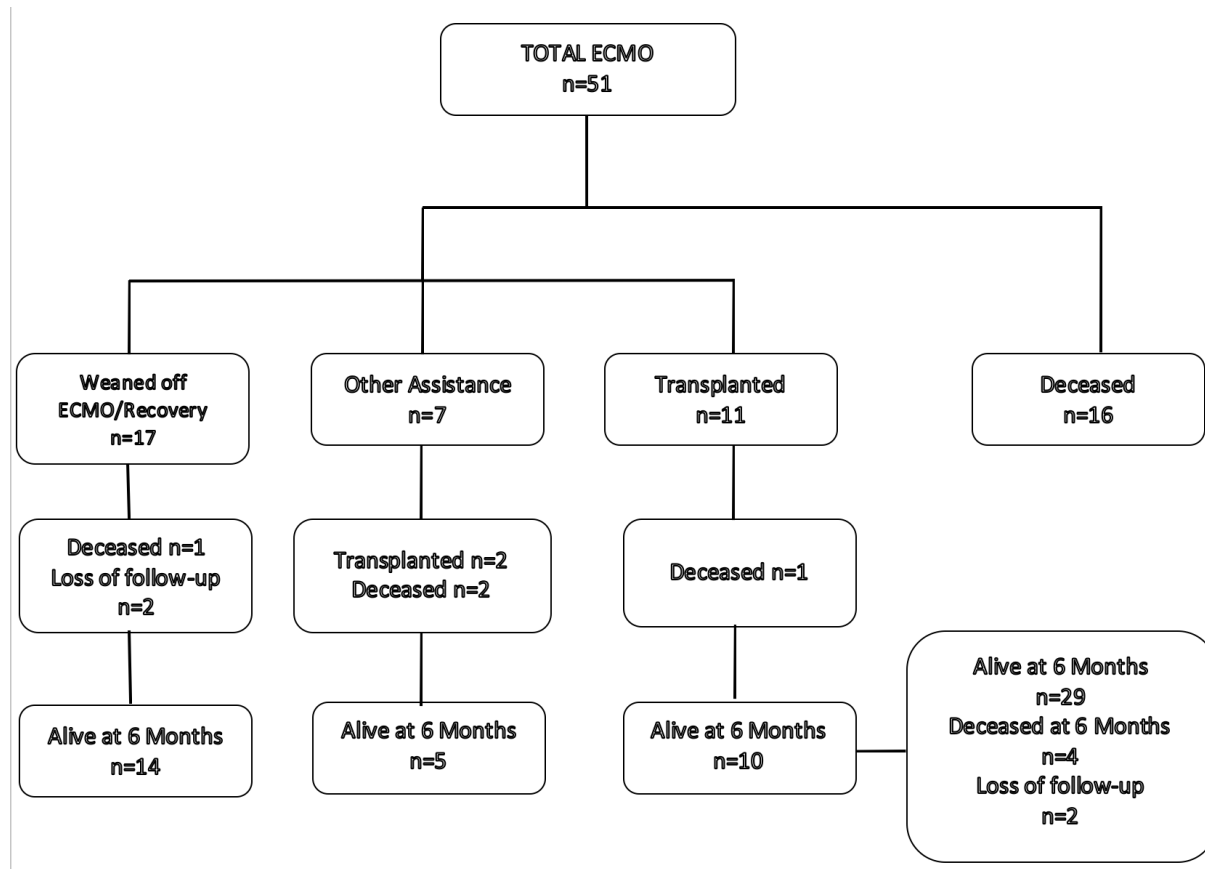

**Figure S3: Calibration plots of the scores predicting the 30-day mortality with ENCOURAGE score (top panel), SOFA score (middle left panel), SAPS II score (middle right panel), lactate (lower left panel) or SAVE score (lower right panel). The diagonal line represents perfect calibration. Vertical bars represent 95% CIs.**

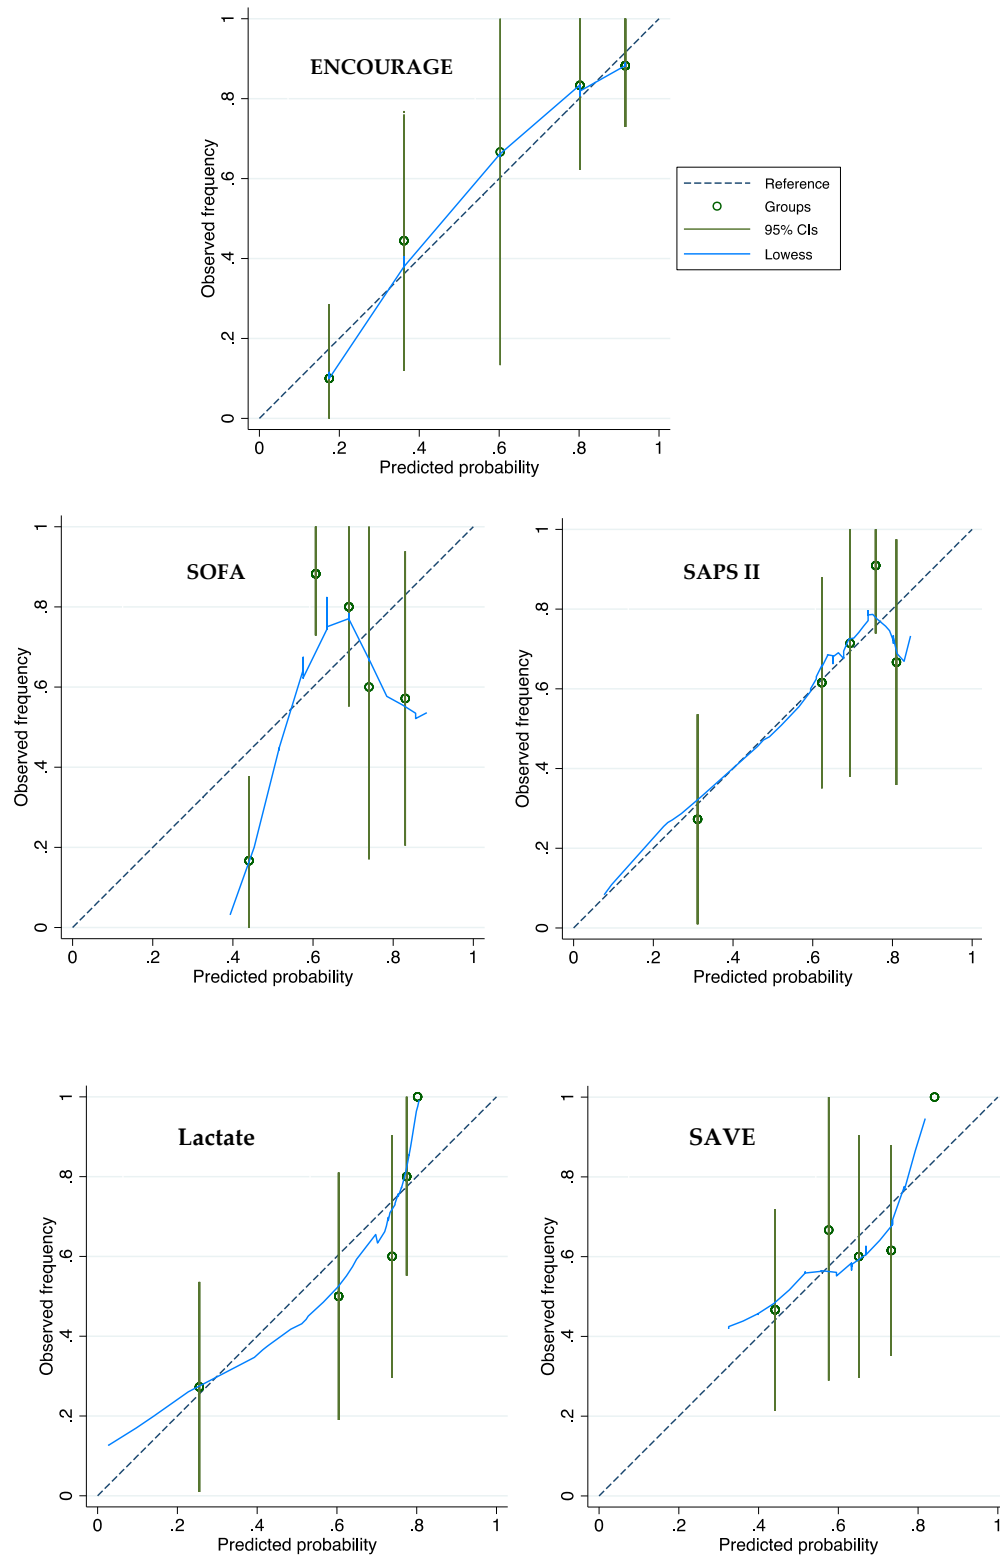

Supplement: jcm-10-00956-s001.pdf [file jcm-10-00956-s001.pdf]
